# Supplementary material for: Interfacial bond engineering for direct integration of functional oxides with Si and Ge
Source: Royal Society of Chemistry journal article supplement (doi:10.1039/d3tc00400g), 2023-01-01
Supplement: d3tc00400g1.pdf [file d3tc00400g1.pdf]

**Electronic Supplementary Information**

**Interfacial bond engineering for direct integration of  
functional oxides with Si and Ge**

*Dmitry V. Averyanov, Ivan S. Sokolov, Alexander N. Taldenkov, Oleg A. Kondratev, Oleg E. Parfenov, Andrey M. Tokmachev and Vyacheslav G. Storchak*

National Research Center “Kurchatov Institute”, Kurchatov Sq. 1, Moscow 123182, Russia

**Contents:**

**Figure S1.** Ball-and-stick models of surface phases.

**Figure S2.** RHEED images of reconstructed Si and Ge surfaces.

**Figure S3.** RHEED images of  $1\times 3$  Eu/Ge(001) with different degree of oxidation.

**Figure S4.** RHEED images of EuO/Ge grown on oxidized templates.

**Figure S5.** Magnetic field dependence of magnetic moment in EuO/Ge(001).

**Figure S6.** Magnetic properties of EuO/Si heterostructures.

**Figure S7.** RHEED and XRD analysis of EuO growth on  $1\times 2$  Eu/Si(001).

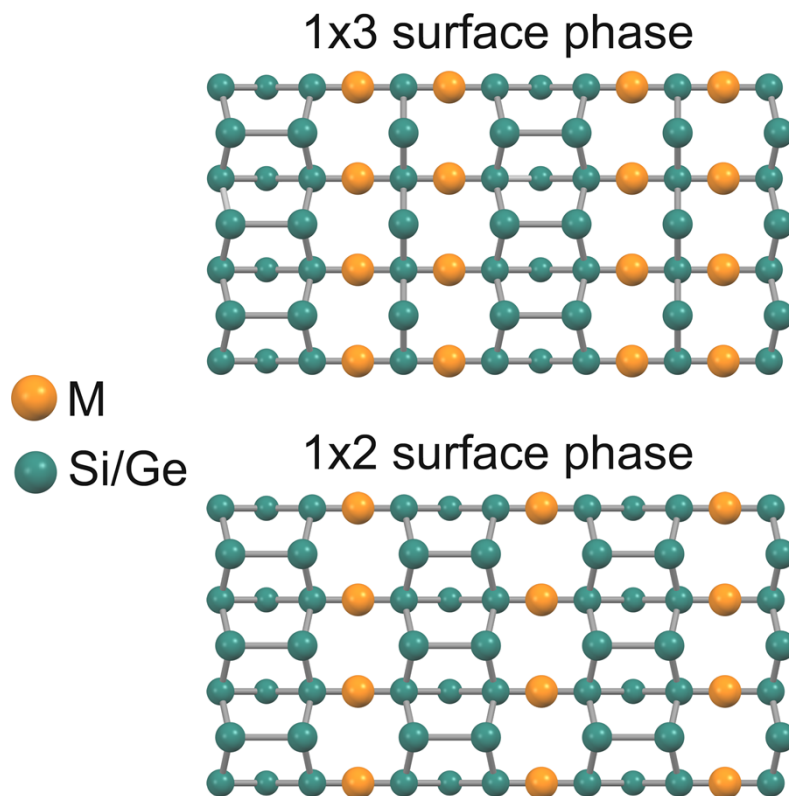

**Figure S1.** Ball-and-stick models of the 1×3 and 1×2 surface phases (top view). Green balls correspond to atoms of the substrate whereas orange balls correspond to metal atoms.

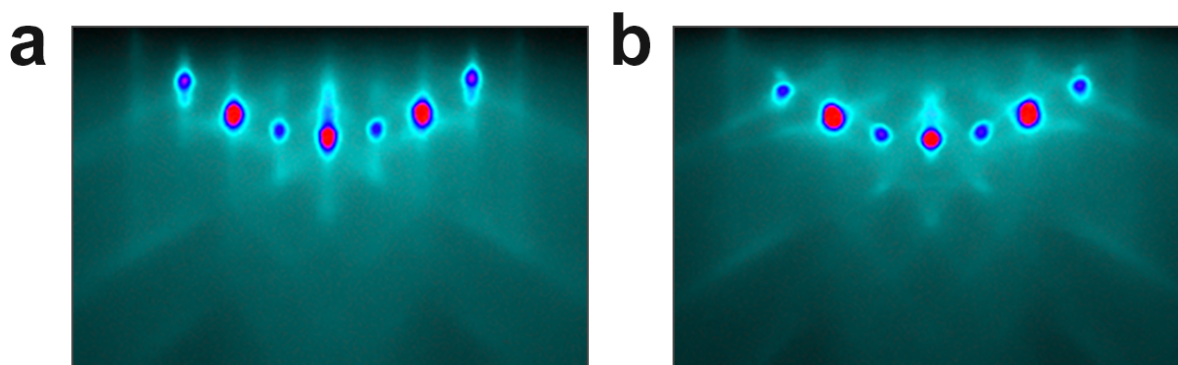

**Figure S2.** RHEED images along the [110] azimuth of clean (a) Ge(001) and (b) Si(001) with the 2×1 reconstruction of the surface corresponding to formation of Ge-Ge and Si-Si dimers.

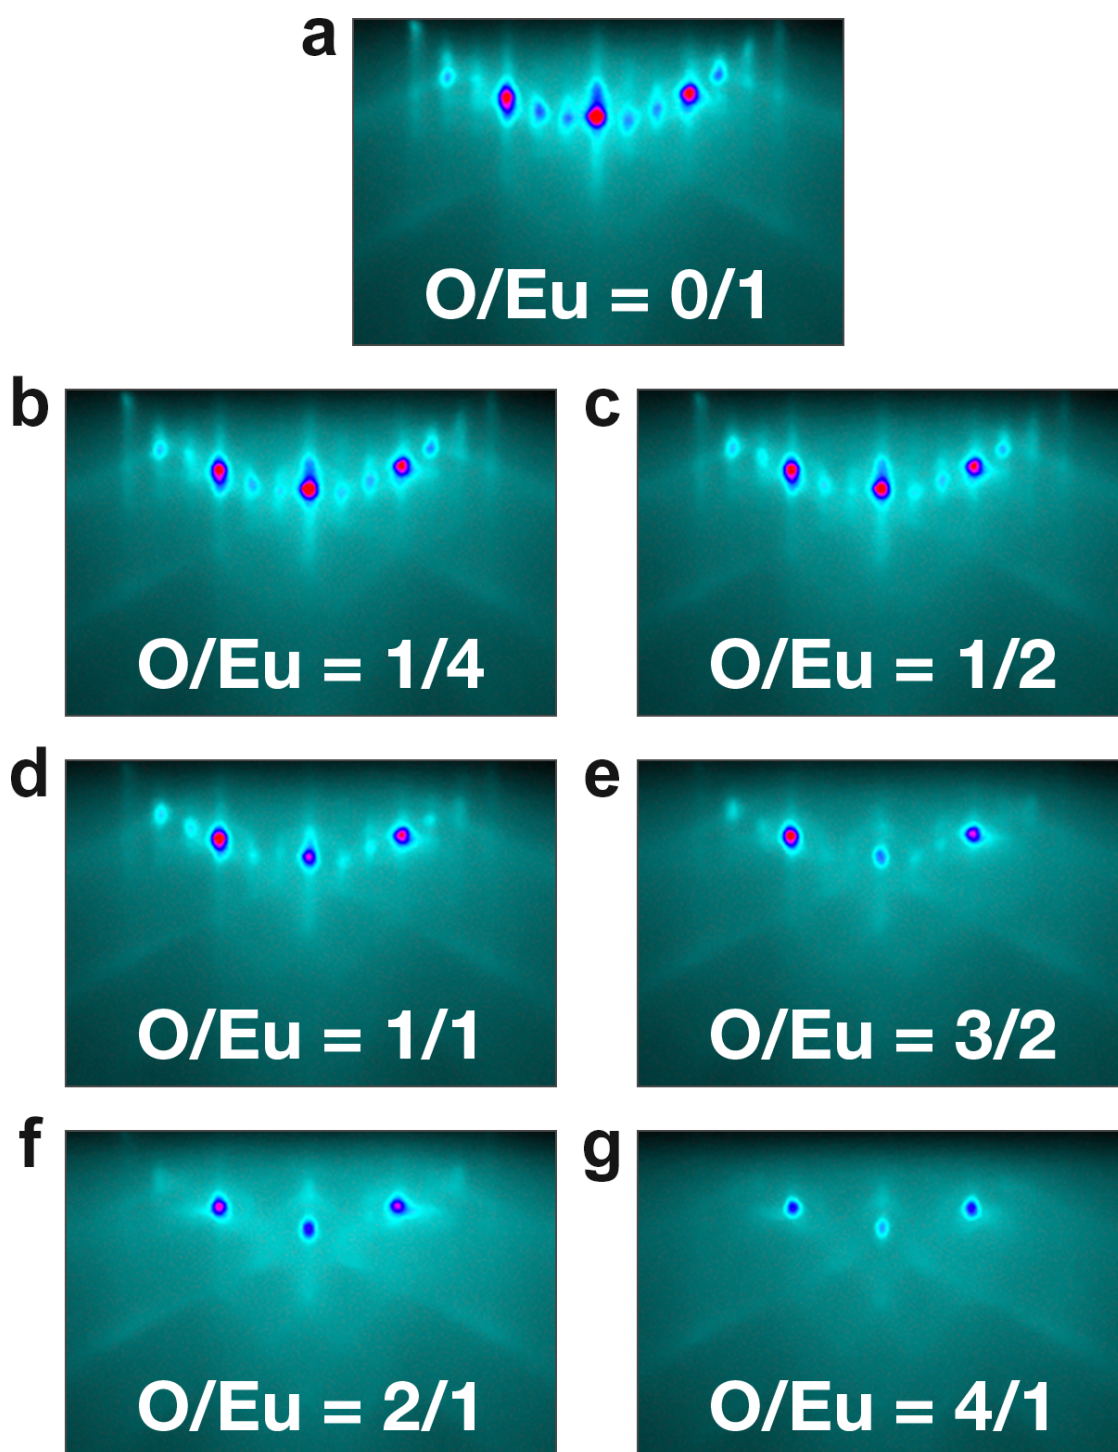

**Figure S3.** RHEED images along the Ge[110] azimuth: (a) the  $1 \times 3$  surface phase of Eu on Ge(001); (b)-(g)  $1 \times 3$  Eu/Ge(001) oxidized to (b)  $O/Eu = 1/4$ , (c)  $O/Eu = 1/2$ , (d)  $O/Eu = 1/1$ , (e)  $O/Eu = 3/2$ , (f)  $O/Eu = 2/1$ , (g)  $O/Eu = 4/1$ .

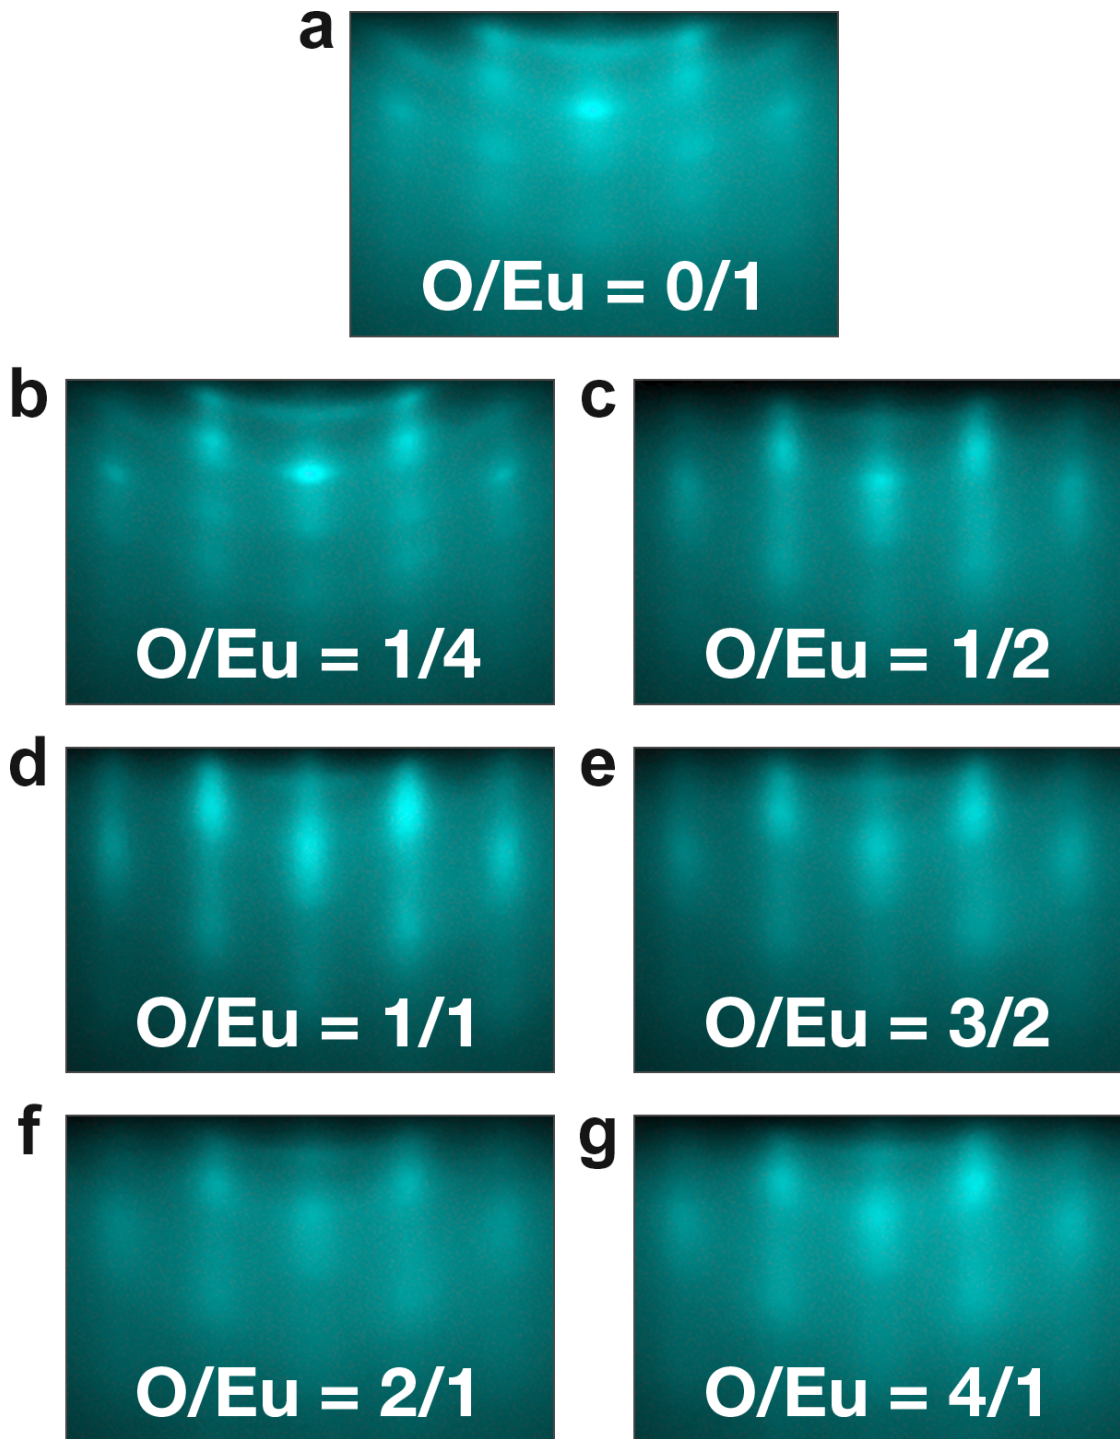

**Figure S4.** RHEED images along the Ge[110] azimuth of EuO films grown on (a) the  $1 \times 3$  surface phase of Eu on Ge(001); (b)-(g)  $1 \times 3$  Eu/Ge(001) oxidized to (b)  $O/Eu = 1/4$ , (c)  $O/Eu = 1/2$ , (d)  $O/Eu = 1/1$ , (e)  $O/Eu = 3/2$ , (f)  $O/Eu = 2/1$ , (g)  $O/Eu = 4/1$ .

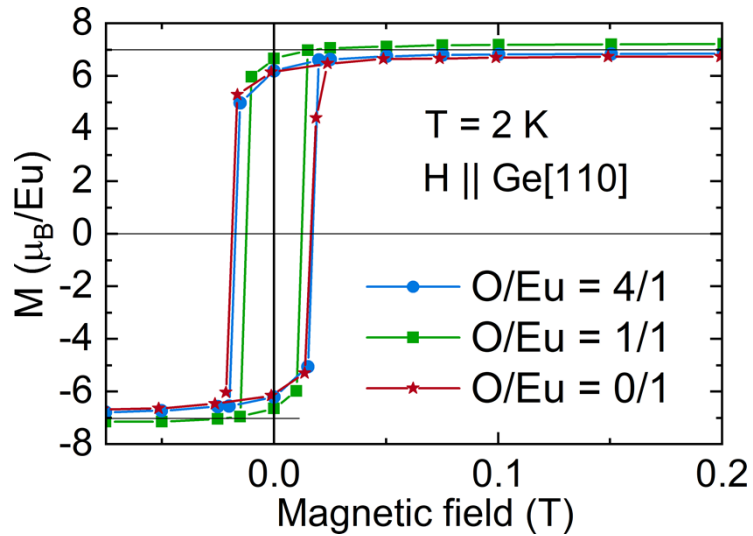

**Figure S5.** In-plane magnetic field dependences at 2 K of magnetic moment per Eu atom in EuO films on Ge(001) produced by synthesis on the  $1 \times 3$  surface phase (red) and the same phase oxidized to O/Eu = 1/1 (green) and 4/1 (blue).

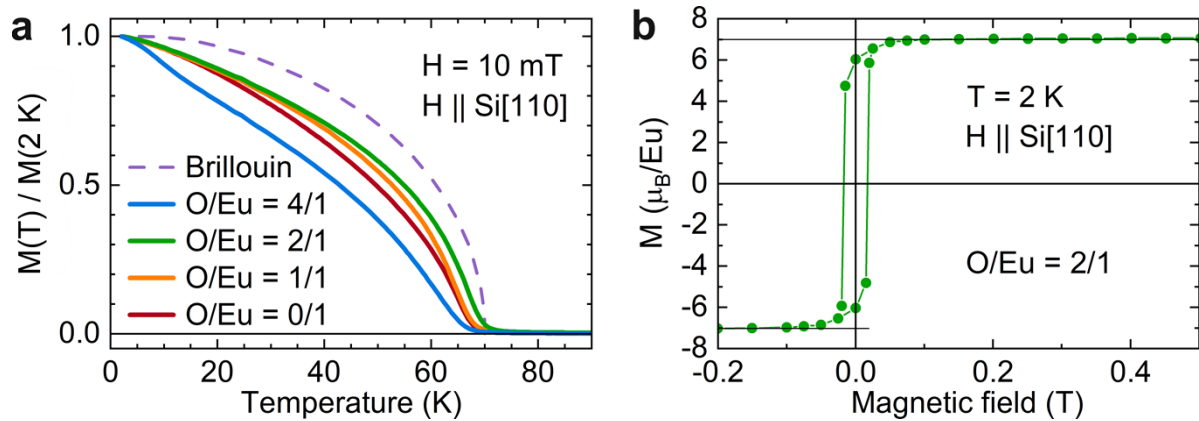

**Figure S6.** Magnetic properties of EuO films on Si(001). (a) Temperature dependences of normalized magnetic moment measured in a magnetic field of 10 mT along Si[110]. The films are produced by synthesis on the  $1 \times 3$  surface phase (red) and the same phase oxidized to O/Eu = 1/1 (orange), 2/1 (green), and 4/1 (blue). For comparison, the  $M(T)$  data are set against the corresponding Brillouin curve (dashed purple). (b) In-plane magnetic field dependence at 2 K of magnetic moment per Eu atom in EuO/Si(001) synthesized on the optimally oxidized  $1 \times 3$  surface phase (O/Eu = 2/1).



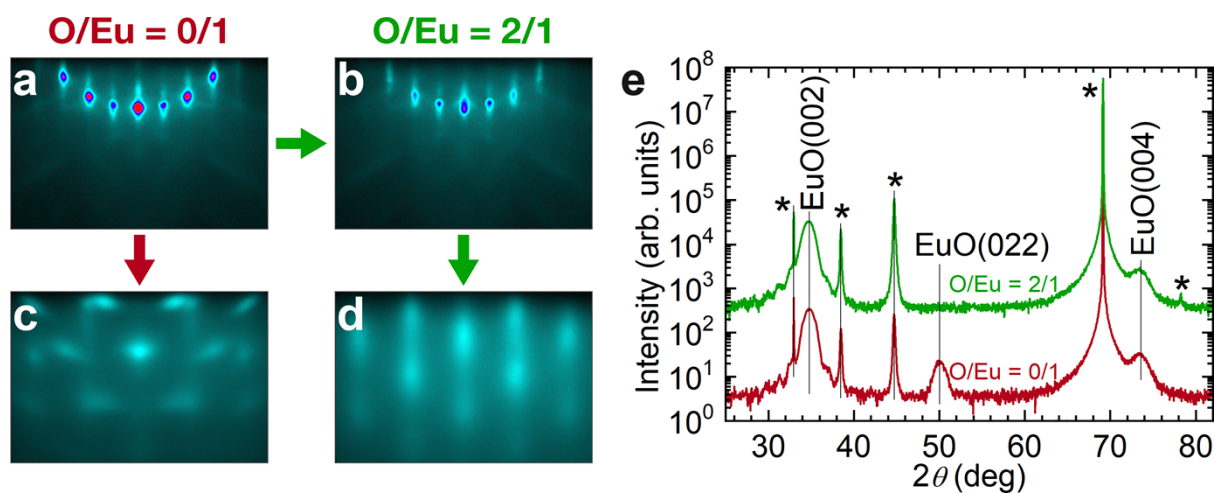

**Figure S7.** Comparison of two routes to EuO synthesis on Si(001). (a)-(d) RHEED images along the Si[110] azimuth: (a) the  $1 \times 2$  surface phase of Eu on Si(001); (b)  $1 \times 2$  Eu/Si(001) optimally oxidized to  $O/Eu = 2/1$ ; (c) and (d) EuO films synthesized on the templates (a) and (b), respectively. (e) XRD  $\theta$ - $2\theta$  scans for EuO grown on pristine (red) and optimally oxidized (green) templates of  $1 \times 2$  Eu/Si(001). Asterisks mark peaks from the substrate and the capping layer.
